# Supplementary material for: The invasive pest Drosophila suzukii uses trans-generational medication to resist parasitoid attack
Source: PubMed Central journal article supplement (PMC5347128; doi:10.1038/srep43696), 2017-03-13
Supplement: srep43696-s1.pdf [file srep43696-s1.pdf]

1 **The invasive pest *Drosophila suzukii* uses trans-generational medication to resist parasitoid attack**

2

3 Poyet M, Eslin P, Chabrerie O, Prud'homme S M, Desouhant E & Gibert P

4 **Supplementary Information**

5

6 Annex 1: Media recipes

7

8 Standard medium recipe (i.e. banana medium):

9 Mix and heat 20g agar in 500mL H<sub>2</sub>O, then add 400 g of mashed banana, 50g of brewers' yeast, 30g of  
10 flour, 20g of sugar. Let cool below 30C° before adding 4g of nipagine previously diluted in 30mL of  
11 alcohol 70°. Finally add 550mL of H<sub>2</sub>O. Mix all ingredients for 5min.

12

13 Atropine medium:

14 Follow the same recipe as for regular medium except for the atropine (0,1%) that has to be diluted in  
15 30mL of alcohol 70° with the nipagine.

16 Annex 2:

17

18 Mean ( $\pm$  S.E.) developmental time (in days) of *Drosophila suzukii* from eggs to adults in regular medium

19 and in atropine containing medium.

20

|                                                | Regular medium   | Atropine medium  |
|------------------------------------------------|------------------|------------------|
| Control                                        | 16.11 $\pm$ 0.20 | 17.56 $\pm$ 0.26 |
| After infestation by <i>A. japonica</i>        | 16.76 $\pm$ 0.28 | 17.84 $\pm$ 0.21 |
| After infestation by <i>T. cf. drosophilae</i> | 16.60 $\pm$ 0.24 | 17.08 $\pm$ 0.34 |

21

22 Annex 3:

23 | Permutation tests and impact of atropine on life-history traits of parasitoids.

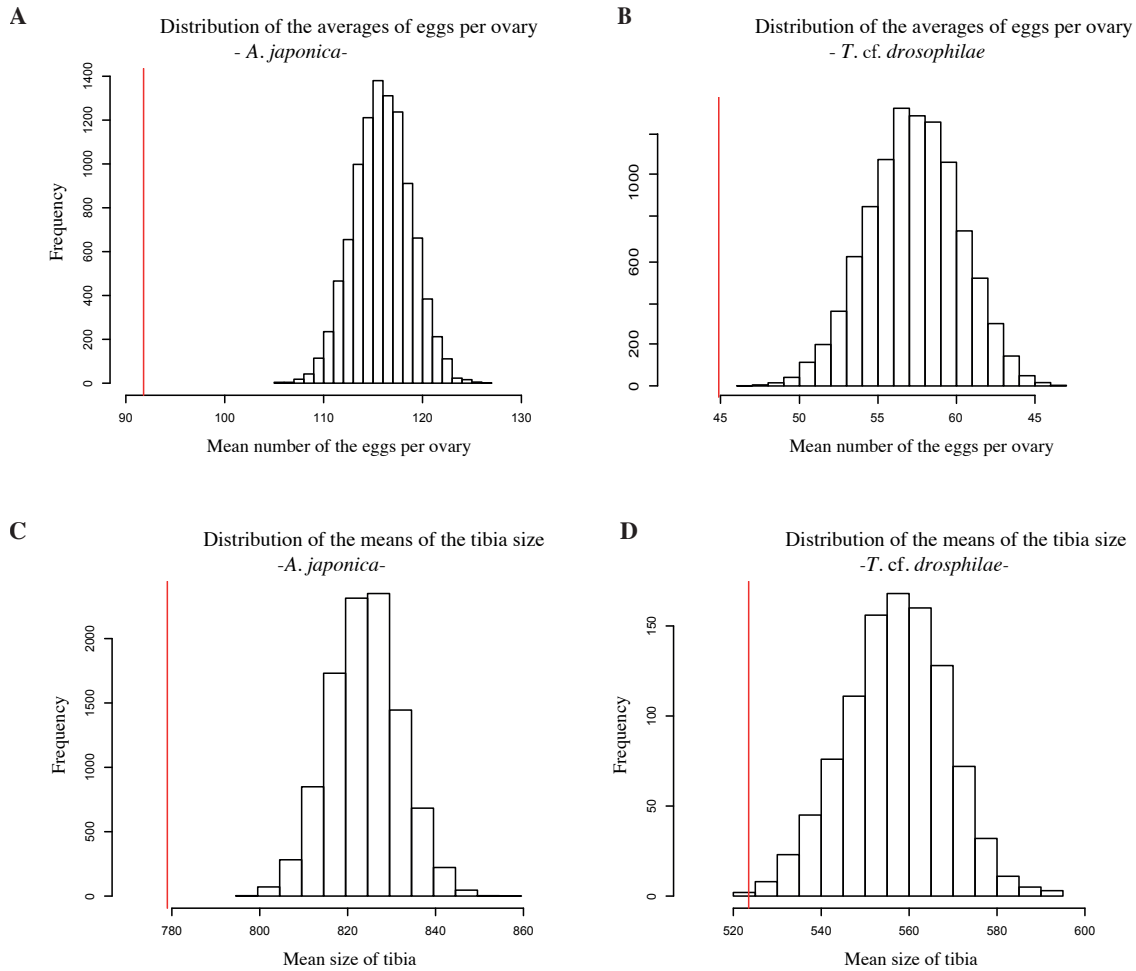

24 **A:** The histogram represents the distribution of the mean number of eggs per ovary for 10,000 random  
 25 draws of 34 out of 55 *A. japonica* individuals emerged from *D. sukukii* reared on regular medium. In our  
 26 experiment, 55 and 34 *A. japonica* individuals emerged from *D. sukukii* reared on regular and atropine  
 27 medium, respectively. The red line shows the mean of eggs per ovary for these 34 individuals. **B:** Same as  
 28 in A, for *T. cf. drosophilae*. In our experiment, 29 and 7 *T. cf. drosophilae* individuals emerged from *D.*  
 29 *sukukii* reared on regular and atropine medium, respectively. **C:** Same as in A, for the impact of atropine  
 30 on the tibia size of *A. japonica*. **D:** Same as in B, for the impact of atropine on the tibia size of *T. cf.*  
 31 *drosophilae*.
